# Supplementary material
Source: MDPI journal article supplement (https://www.mdpi.com/2073-445X/12/4/917)
Supplement: s1 [file s1]

## Supplementary materials

**Table S1.** Policy reference for scenario setting.

| Policy                    | Objectives                                                                                                                                                                                | Sources |
|---------------------------|-------------------------------------------------------------------------------------------------------------------------------------------------------------------------------------------|---------|
| For economic development  | The city becomes the “National demonstration city of high-end leisure and tourism”.                                                                                                       | [1]     |
|                           | The city’s urbanization rate reaches to 75% in 2030.                                                                                                                                      | [2]     |
|                           | The regional GDP will reach 160 billion yuan by 2025, and will reach 340 billion yuan by 2035.                                                                                            | [3]     |
| For ecological protection | Focus on the goal of ecological innovation and become a 'Yangtze River Delta eco-innovation demonstration city'.                                                                          | [1]     |
|                           | It is necessary to follow the ecological redline, strengthen the restoration of ecologically damaged areas, and reasonably guide the development and utilization of ecological resources. | [2,3]   |

1. Liyang introduces the "14th Five-Year" Territorial Tourism Development Plan. Available online: <http://www.liyang.gov.cn/index.php?c=phone&a=show&id=168037&catid=40409> (accessed on 4 April 2023).
2. Notice of Liyang government office on printing and issuing the “Special planning work plan for Liyang Master Plan (2016-2030)”. [http://www.liyang.gov.cn/html/czly/2018/OPEHQFEM\\_0216/5690.html](http://www.liyang.gov.cn/html/czly/2018/OPEHQFEM_0216/5690.html) (accessed on 4 April 2023).
3. Liyang Territorial Spatial Master Plan (2021-2035) (Draft) Public Notice. [http://www.liyang.gov.cn/html/czly/2022/NDKMAMKM\\_1221/30553.html](http://www.liyang.gov.cn/html/czly/2022/NDKMAMKM_1221/30553.html) (accessed on 4 April 2023).

**Table S2.** Correlation matrix of driving factors.

| Driving factors              | DEM    | Aspect | Slope  | Precipitation | Temperature | Soil salinity | Soil water | Distance to major rivers | Distance to main traffic | Distance to township centers | Population density | Per capita GDP | Fixed assets investment | Nighttime light |
|------------------------------|--------|--------|--------|---------------|-------------|---------------|------------|--------------------------|--------------------------|------------------------------|--------------------|----------------|-------------------------|-----------------|
| DEM                          | 1.0000 |        |        |               |             |               |            |                          |                          |                              |                    |                |                         |                 |
| Aspect                       | 0.0014 | 1.0000 |        |               |             |               |            |                          |                          |                              |                    |                |                         |                 |
| Slope                        | 0.5451 | 0.0040 | 1.0000 |               |             |               |            |                          |                          |                              |                    |                |                         |                 |
| Precipitation                | 0.1385 | 0.0004 | 0.1052 | 1.0000        |             |               |            |                          |                          |                              |                    |                |                         |                 |
| Temperature                  | 0.0018 | 0.0006 | 0.0183 | 0.5154        | 1.0000      |               |            |                          |                          |                              |                    |                |                         |                 |
| Soil salinity                | 0.0113 | 0.0000 | 0.0070 | 0.0006        | 0.0024      | 1.0000        |            |                          |                          |                              |                    |                |                         |                 |
| Soil water                   | 0.2344 | 0.0004 | 0.1147 | 0.0191        | 0.0553      | 0.8096*       | 1.0000     |                          |                          |                              |                    |                |                         |                 |
| Distance to major rivers     | 0.4526 | 0.0007 | 0.1761 | 0.0318        | 0.0001      | 0.0156        | 0.0771     | 1.0000                   |                          |                              |                    |                |                         |                 |
| Distance to main traffic     | 0.1646 | 0.0000 | 0.0615 | 0.0052        | 0.0283      | 0.0062        | 0.1026     | 0.1432                   | 1.0000                   |                              |                    |                |                         |                 |
| Distance to township centers | 0.3289 | 0.0002 | 0.1434 | 0.0439        | 0.0027      | 0.0066        | 0.0497     | 0.3354                   | 0.2551                   | 1.0000                       |                    |                |                         |                 |
| Population density           | 0.0175 | 0.0009 | 0.0137 | 0.0133        | 0.0021      | 0.0025        | 0.0096     | 0.0218                   | 0.0298                   | 0.0846                       | 1.0000             |                |                         |                 |
| Per capita GDP               | 0.0508 | 0.0004 | 0.0328 | 0.0042        | 0.0105      | 0.0062        | 0.0829     | 0.0484                   | 0.0690                   | 0.0521                       | 0.0543             | 1.0000         |                         |                 |
| Fixed assets investment      | 0.0383 | 0.0007 | 0.0289 | 0.0054        | 0.0009      | 0.0034        | 0.0183     | 0.0206                   | 0.0582                   | 0.0334                       | 0.0917             | 0.8547*        | 1.0000                  |                 |
| Nighttime light              | 0.0404 | 0.0008 | 0.0262 | 0.0188        | 0.0055      | 0.0013        | 0.0084     | 0.0499                   | 0.0897                   | 0.2222                       | 0.4568             | 0.2211         | 0.2681                  | 1.0000          |

‘\*’ indicates that the correlation coefficient between two factors is greater than the threshold of 0.8.

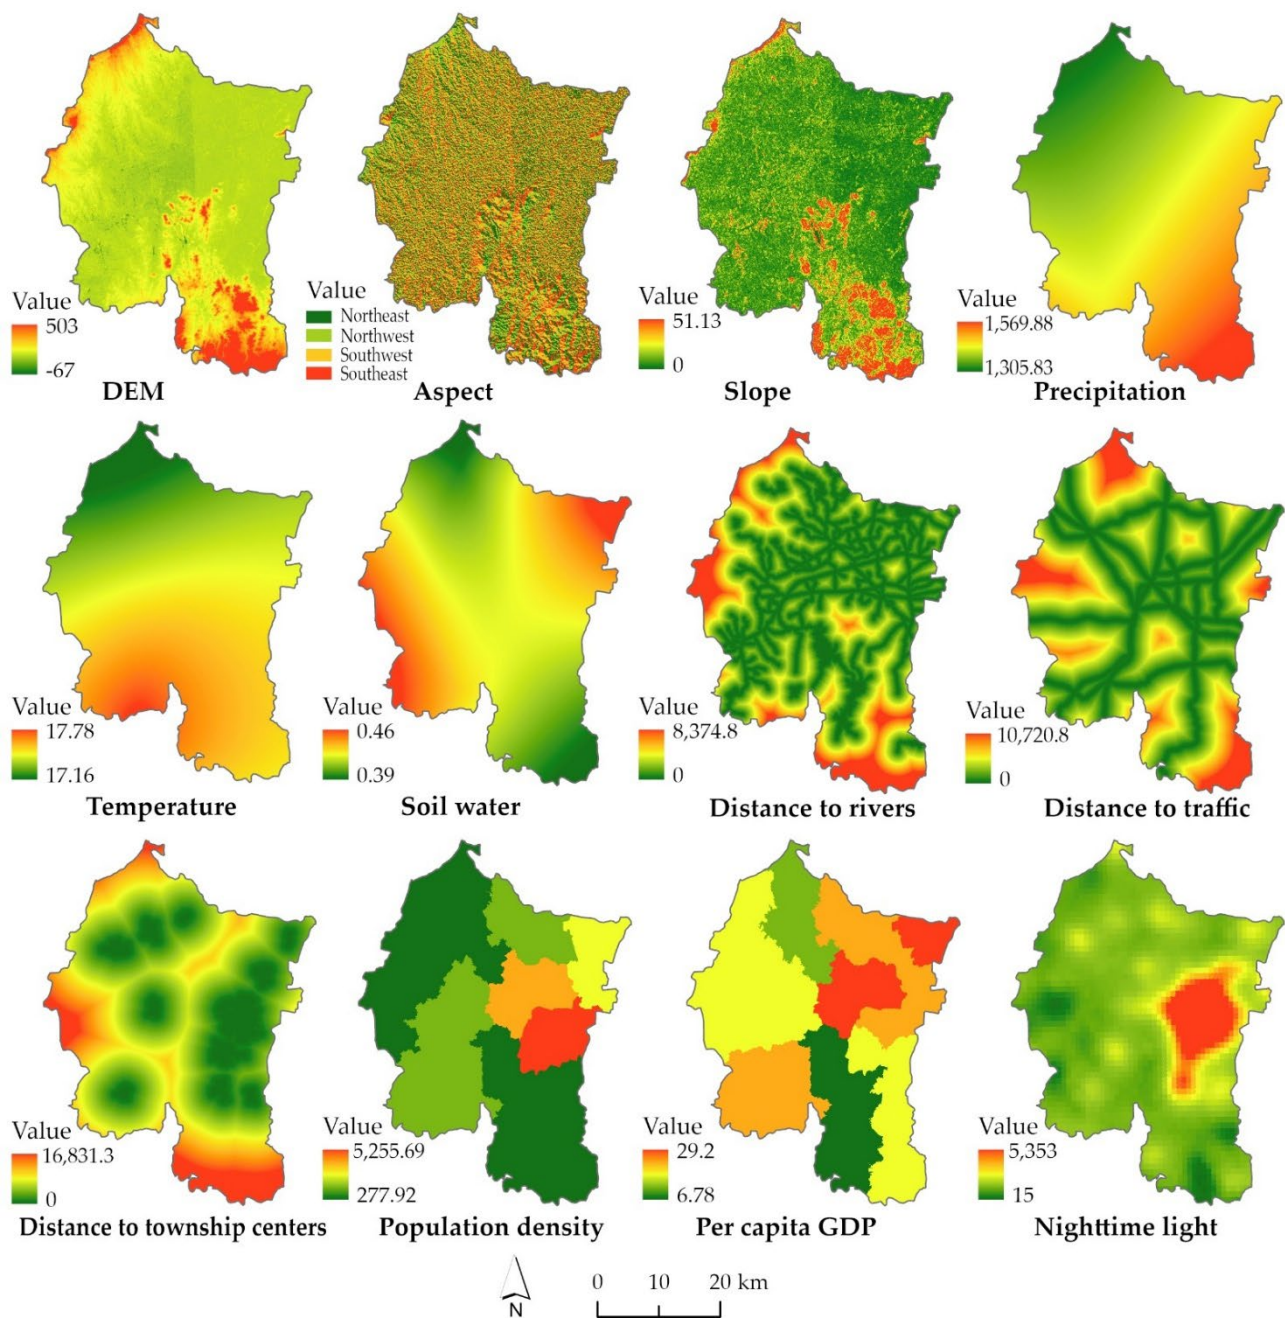

**Figure S1.** Driving factors of land use change.

**Table S3.** Regression analysis.

| Land use types                    | AUC    | Constant | DEM    | Aspect | Slope   | Precipitation | Temperature | Soil water | Distance to major rivers | Distance to main traffic | Distance to township centers | Population density | Per capita GDP | Nighttime light |
|-----------------------------------|--------|----------|--------|--------|---------|---------------|-------------|------------|--------------------------|--------------------------|------------------------------|--------------------|----------------|-----------------|
| Cultivated land                   | 0.9001 | 8.1847   | -0.032 | 0      | 0.0324  | -0.00467      | 0.0057      | 0          | 0                        | 0                        | 0                            | 0                  | 0              | -0.00062        |
| Forest land                       | 0.9088 | -10.7151 | 0.0366 | 0      | -0.0368 | 0.00558       | -0.0064     | 0          | 0                        | 0                        | 0                            | 0                  | 0              | 0               |
| Grassland                         | 0.743  | -2.9345  | 0.0057 | 0      | -0.0054 | 0             | 0           | 0          | 0                        | 0                        | 0                            | 0                  | 0              | 0               |
| Water area                        | 0.8372 | -2.0023  | 0      | 0      | 0       | 0             | 0           | -0.00025   | -0.0011                  | 0                        | 0                            | 0                  | 0              | 0               |
| Rural settlements                 | 0.6006 | -3.0169  | -0.012 | 0      | 0.0119  | 0             | 0           | 0          | 0                        | 0                        | 0.00004                      | 0                  | 0.02526        | 0               |
| Unused land                       | 0.7326 | -90.4526 | 0.0105 | 0      | 0       | -0.01769      | 6.3127      | 0          | 0                        | 0                        | 0                            | -0.00032           | 0              | 0.0007          |
| Urban and other construction land | 0.9096 | -1.5901  | -0.033 | 0      | 0.0347  | 0             | 0           | 0          | 0                        | -0.00051                 | -0.00046                     | 0                  | 0              | 0.00055         |

**Table S4.** Change rate of demand for land use services under different scenarios.

| Scenarios \ Change rate | Crop production (%/year) | Area of woodland (%/year) | Area of grassland (%/year) | Area of water (%/year) | Area of Rural settlements (%/year) | Area of urban and other construction land (%/year) |
|-------------------------|--------------------------|---------------------------|----------------------------|------------------------|------------------------------------|----------------------------------------------------|
| NGS                     | -0.311                   | -                         | -                          | -                      | 0.361                              | 0.691                                              |
| EDS                     | -0.311                   | -                         | -                          | -                      | 0.374                              | 1.022                                              |
| EPS                     | -0.311                   | 1                         | 1                          | 1                      | -                                  | -                                                  |

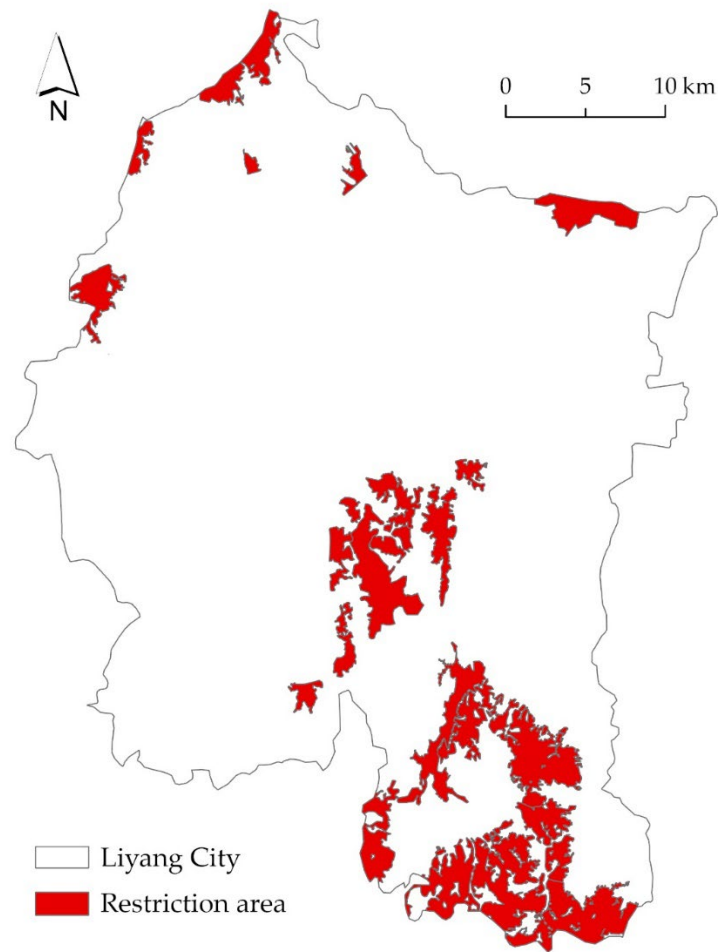**Figure S2.** Spatial restrictions for land use simulation.**Table S5.** Conversion resistance of land use types under different scenarios.

| Land-use type \ Scenario | NGS  | EDS  | EPS  |
|--------------------------|------|------|------|
| Cultivated land          | 0.7  | 0.7  | 0.7  |
| Woodland                 | 0.85 | 0.85 | 0.95 |
| Grassland                | 0.65 | 0.6  | 0.9  |
| Water area               | 0.85 | 0.85 | 0.95 |
| Rural settlements        | 0.65 | 0.65 | 0.65 |

|                                   |     |     |     |
|-----------------------------------|-----|-----|-----|
| Unused land                       | 0.5 | 0.4 | 0.5 |
| Urban and other construction land | 0.9 | 0.9 | 0.9 |

**Table S6.** Conversion matrix under different scenarios.

| NGS & EDS                            | Cultivated<br>land | Woodland | Grassland | Water<br>area | Rural<br>settlements | Unused<br>land | Urban and other<br>construction land |
|--------------------------------------|--------------------|----------|-----------|---------------|----------------------|----------------|--------------------------------------|
| Cultivated land                      | 1                  | 1        | 1         | 0             | 1                    | 1              | 1                                    |
| Woodland                             | 1                  | 1        | 0         | 0             | 0                    | 0              | 1                                    |
| Grassland                            | 0                  | 1        | 1         | 1             | 1                    | 0              | 1                                    |
| Water area                           | 1                  | 0        | 0         | 1             | 0                    | 0              | 1                                    |
| Rural settlements                    | 0                  | 0        | 0         | 0             | 1                    | 0              | 1                                    |
| Unused land                          | 1                  | 1        | 1         | 1             | 1                    | 1              | 1                                    |
| Urban and other<br>construction land | 0                  | 0        | 0         | 0             | 0                    | 0              | 1                                    |
| <b>EPS</b>                           |                    |          |           |               |                      |                |                                      |
| Cultivated land                      | 1                  | 1        | 1         | 0             | 1                    | 1              | 1                                    |
| Woodland                             | 0                  | 1        | 0         | 0             | 0                    | 0              | 1                                    |
| Grassland                            | 0                  | 1        | 1         | 0             | 0                    | 0              | 1                                    |
| Water area                           | 0                  | 0        | 0         | 1             | 0                    | 0              | 1                                    |
| Rural settlements                    | 0                  | 0        | 0         | 0             | 1                    | 0              | 1                                    |
| Unused land                          | 1                  | 1        | 1         | 1             | 1                    | 1              | 1                                    |
| Urban and other<br>construction land | 0                  | 0        | 0         | 0             | 0                    | 0              | 1                                    |

**Table S7.** Kappa coefficients of simulation validation.

| Coefficient | Overall | Cultivated<br>land | Woodland | Grassland | Water<br>area | Rural<br>settlements | Unused<br>land | Urban and other<br>construction land |
|-------------|---------|--------------------|----------|-----------|---------------|----------------------|----------------|--------------------------------------|
| Kappa       | 0.765   | 0.778              | 0.778    | 0.640     | 0.895         | 0.866                | 0.230          | 0.753                                |
| Kloc        | 0.805   | 0.799              | 0.833    | 0.728     | 0.959         | 0.869                | 0.347          | 0.757                                |
| Khisto      | 0.950   | 0.973              | 0.933    | 0.878     | 0.933         | 0.997                | 0.663          | 0.995                                |
